# Supplementary material for: Evaluating China’s Role in Achieving the 1.5 °C Target of the Paris Agreement
Source: MDPI journal article supplement (doi:10.3390/en15166002), 2022-08-18
Supplement: s1 [file s1]

Archive with 1 entries (1 files):
- energies-1839768-supplementary.pdf
