# Supplementary material for: Evaluating China’s Role in Achieving the 1.5 °C Target of the Paris Agreement
Source: MDPI journal article supplement (doi:10.3390/en15166002), 2022-08-18
Supplement: s1 [file s1 › energies-1839768-supplementary.pdf]

# **Supplementary Materials for**

## **Evaluating China's role in achieving the 1.5 °C target of the Paris Agreement**

**Weiwei Xiong <sup>1,2,\*</sup>, Katsumasa Tanaka <sup>2,3,\*</sup>, Philippe Ciais <sup>2</sup> and Liang Yan <sup>1</sup>**

<sup>1</sup> School of Economics and Management, China University of Geosciences, Wuhan 430074, China; ylyzb@cug.edu.cn

<sup>2</sup> Laboratoire des Sciences du Climat et de l'Environnement (LSCE), IPSL, CEA/CNRS/UVSQ, Université Paris-Saclay, Gif-sur-Yvette 91191, France; philippe.ciais@cea.fr

<sup>3</sup> Earth System Risk Analysis Section, Earth System Division, National Institute for Environmental Studies (NIES), Tsukuba 305-8506, Japan

\* Correspondence: xww08012115@cug.edu.cn (W.X.); katsumasa.tanaka@lsce.ipsl.fr (K.T.)

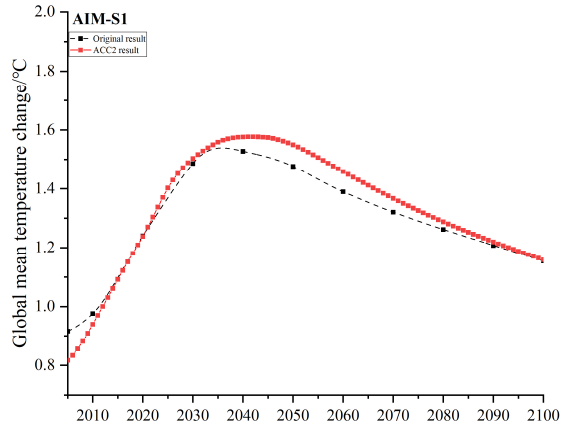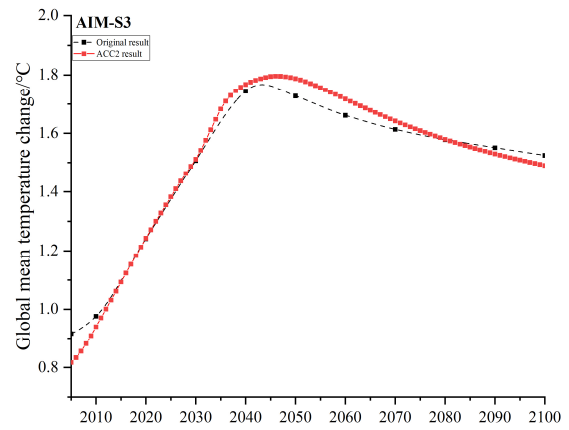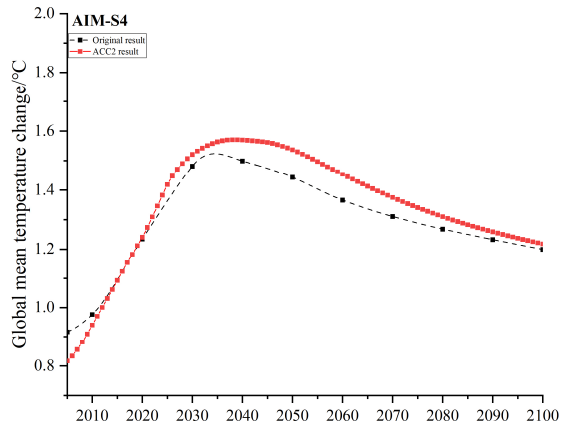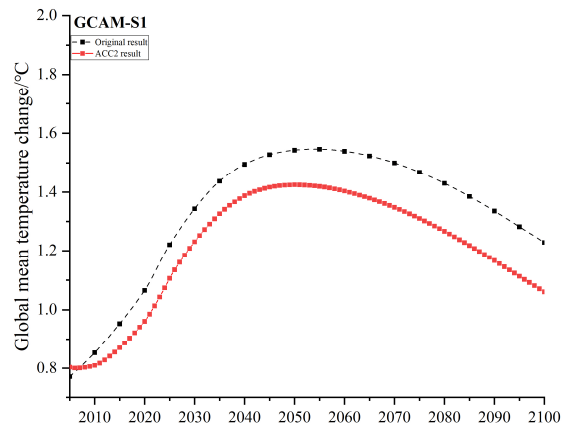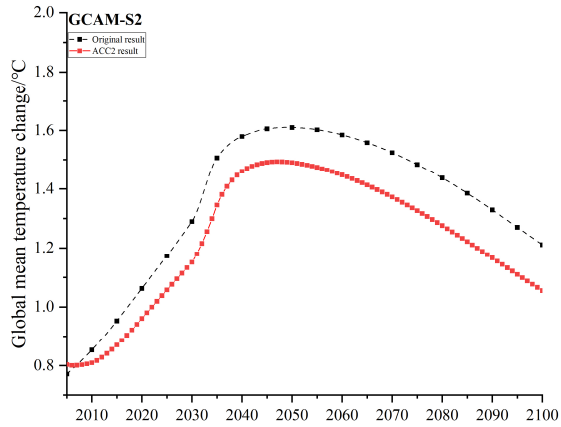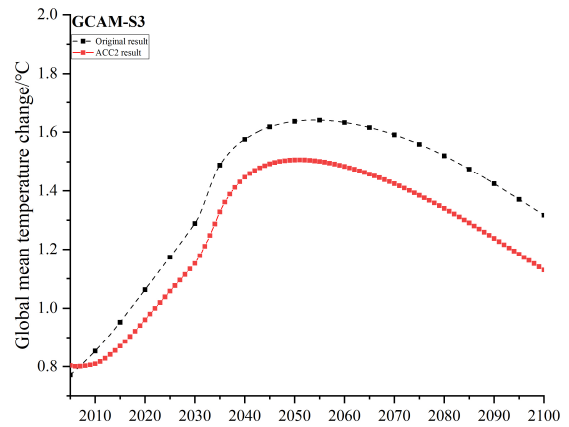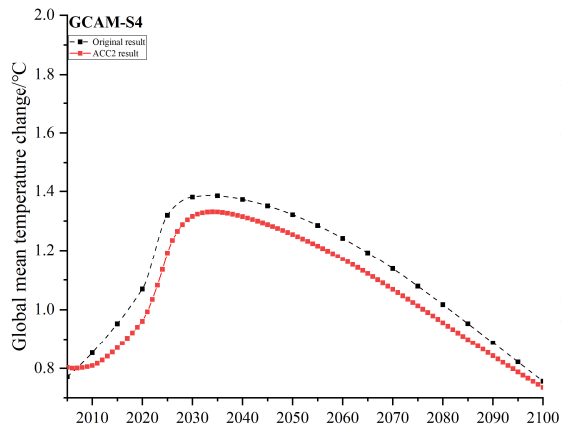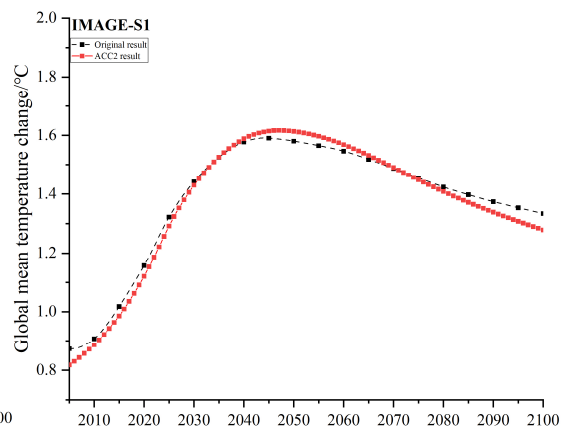

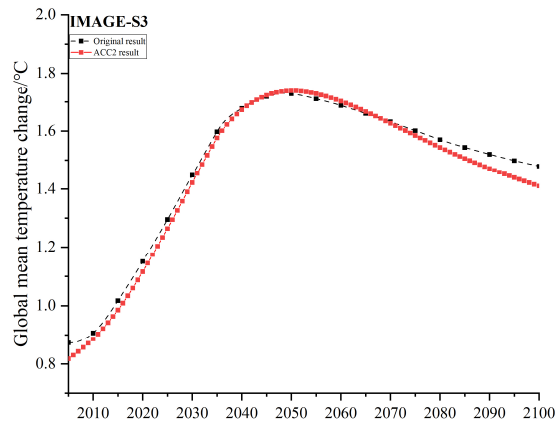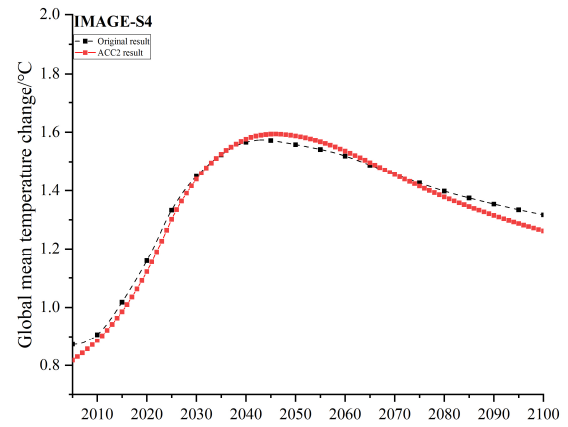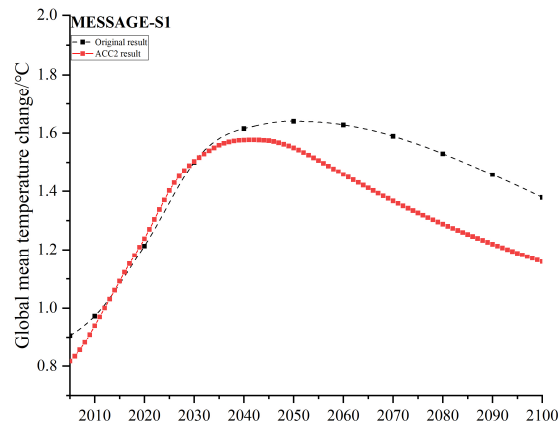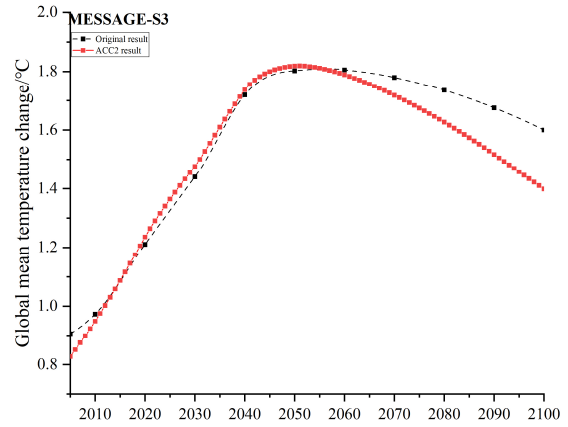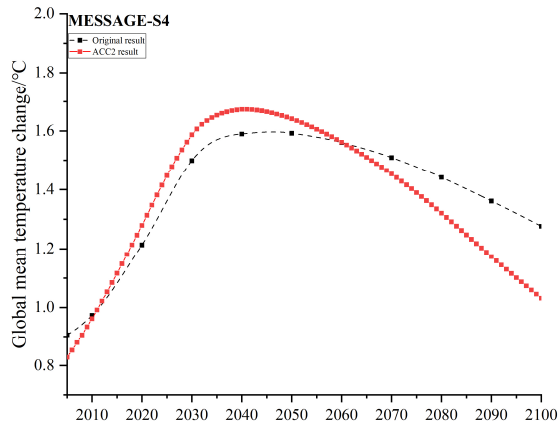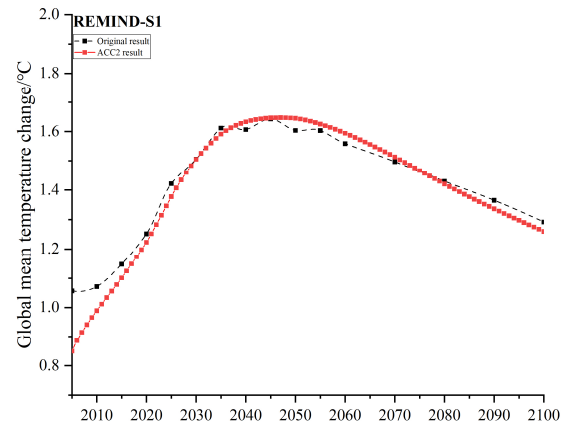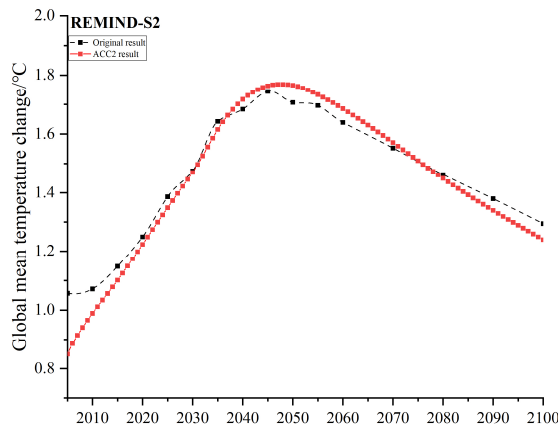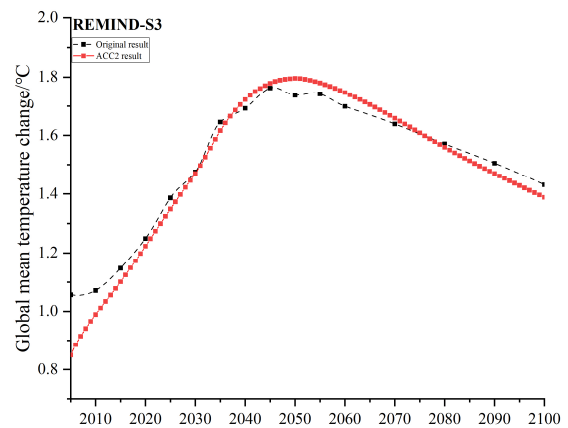

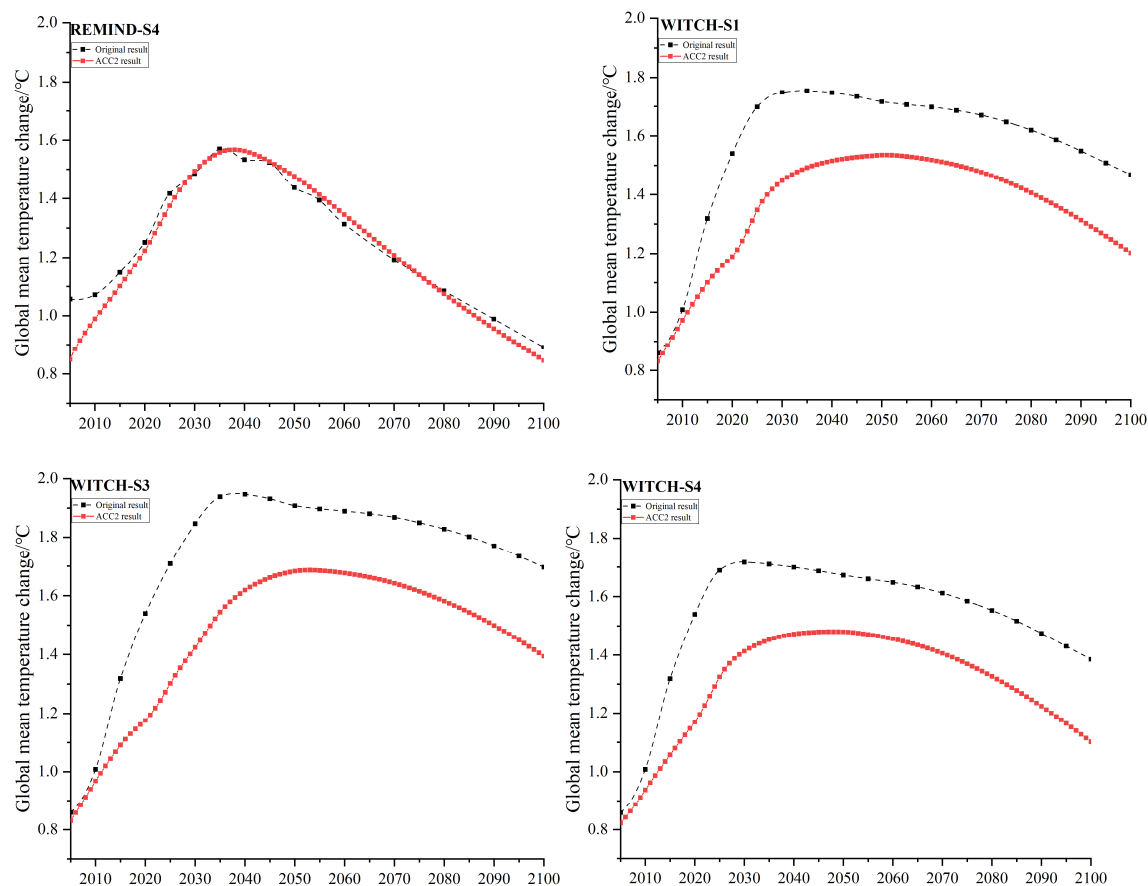

**Figure S1.** The results of global mean temperature change between the original and the ACC2 for different pathways. The black dotted line represents the original result provided by the given model, and the solid red lines indicate the results calculated by the ACC2.

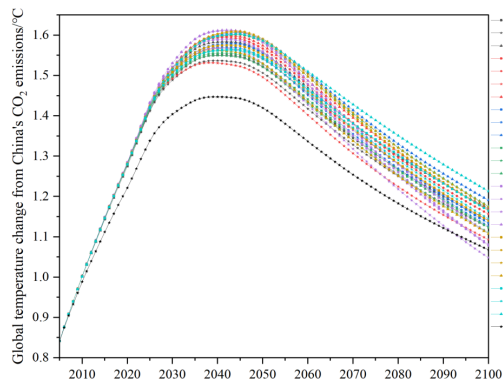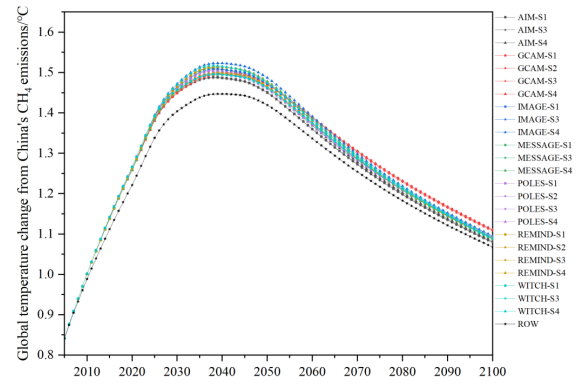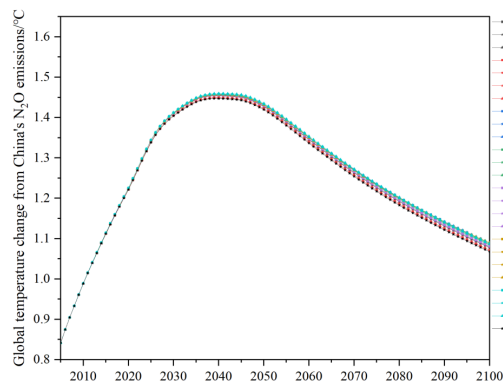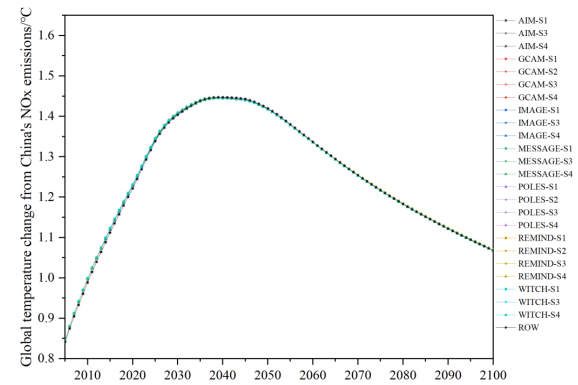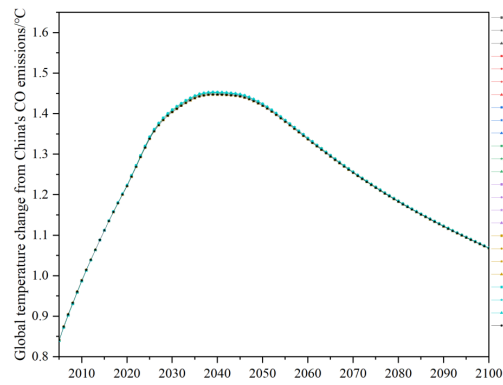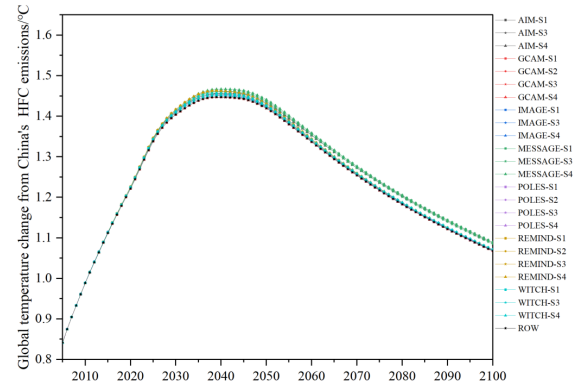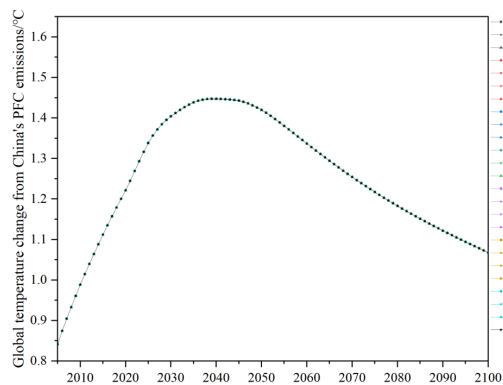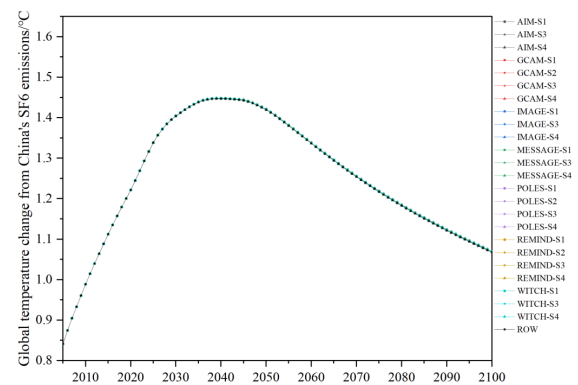

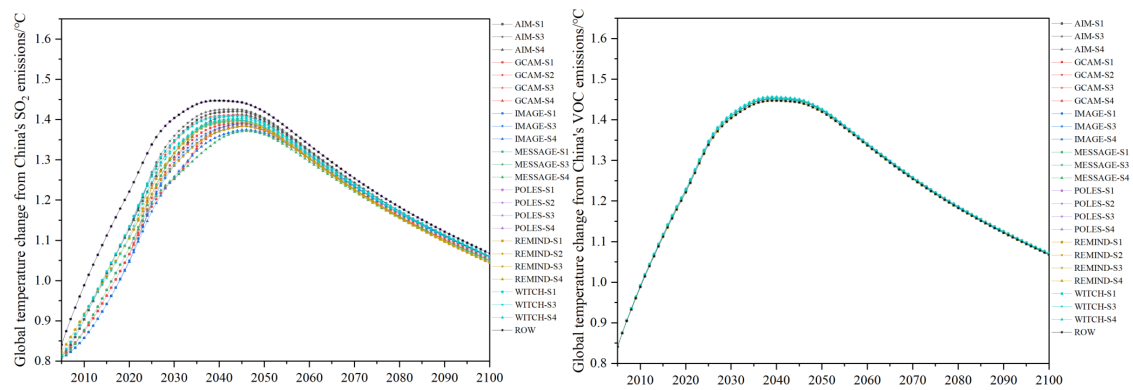

**Figure S2.** Global mean temperature change caused by China's emissions of individual gases. ROW pathway represents the contribution of the rest of the world.

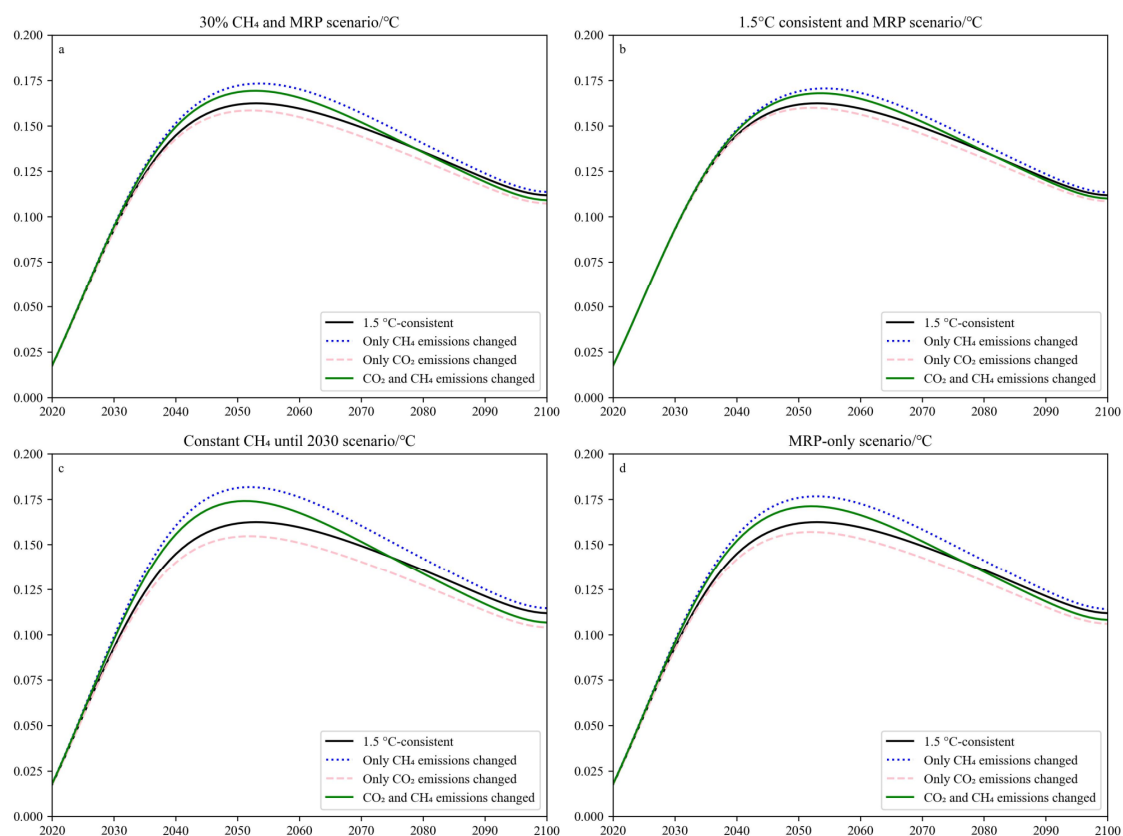

**Figure S3.** China's contribution to global warming under the different CH<sub>4</sub> mitigation scenarios. The 1.5 °C-consistent scenario is the benchmark scenario. Colors are designated according to how CO<sub>2</sub> and CH<sub>4</sub> emissions are hypothetically altered.
